# Supplementary material for: Bimetallic MOF-templated synthesis of alloy nanoparticle-embedded porous carbons for oxygen evolution and reduction reactions
Source: Royal Society of Chemistry journal article supplement (doi:10.1039/c9dt02943e), 2019-01-01
Supplement: c9dt02943e1.pdf [file c9dt02943e1.pdf]

## Supporting Information

### **Bimetallic MOF-templated synthesis of alloy nanoparticles-embedded porous carbons for oxygen evolution and reduction reactions**

Zakary Lionet<sup>[a]</sup>, Shun Nishijima<sup>[a]</sup>, Tae-Ho Kim<sup>[b]</sup>, Yu Horiuchi<sup>\*[a]</sup>, Soo Wahn Lee<sup>[c]</sup> and Masaya Matsuoka<sup>\*[a]</sup>

[a] Department of Applied Chemistry, Graduate school of engineering  
Osaka Prefecture University  
1-1, Gakuen-cho, Naka-ku, Sakai, Osaka 599-8531, Japan

[b] Division of Mechanics and ICT Convergence Engineering, Sun Moon University,  
Asan, Republic of Korea

[c] Department of Environmental and Bio-Chemical Engineering, Sun Moon  
University, GalSan-Ri, Tangjung-Myon, Asan, Chung-nam 336708, Republic of  
Korea

### Table of content

|                                                                               |   |
|-------------------------------------------------------------------------------|---|
| <b>Structural characterization of the MOFs</b> .....                          | 2 |
| <b>N<sub>2</sub> adsorption-desorption isotherms of Fe@C composites</b> ..... | 3 |
| <b>Transmission electron microscopy pictures of FeM@C composites</b> .....    | 4 |

## Structural characterization of the MOFs

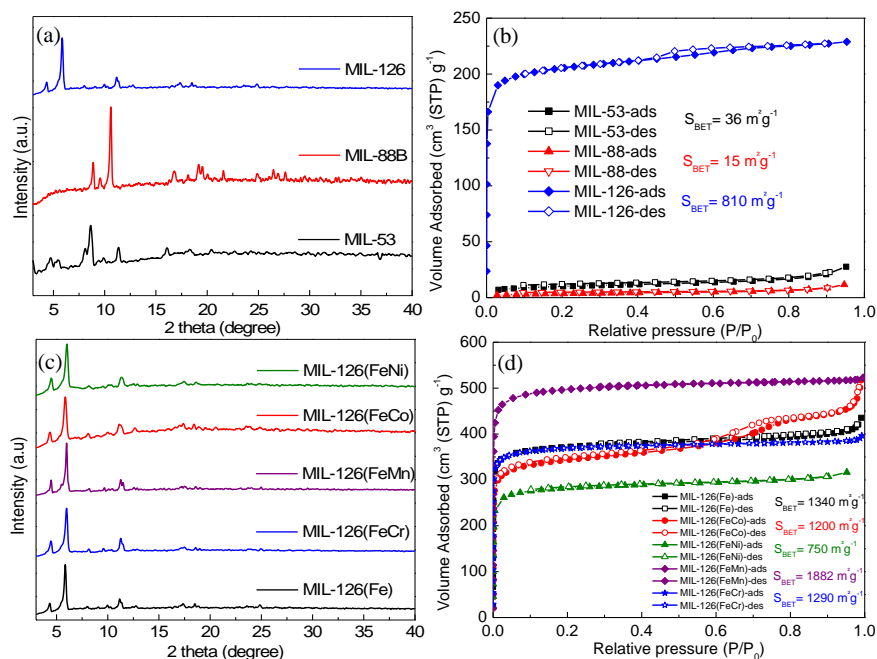

**Fig. S1.** PXRD patterns and N<sub>2</sub> adsorption-desorption isotherms of (a), (b) iron-based MOFs fabricated from direct synthesis and (c), (d) bimetallic MIL-126 synthesized by ligand exchange process

## N<sub>2</sub> adsorption-desorption isotherms of MOF-derived composites

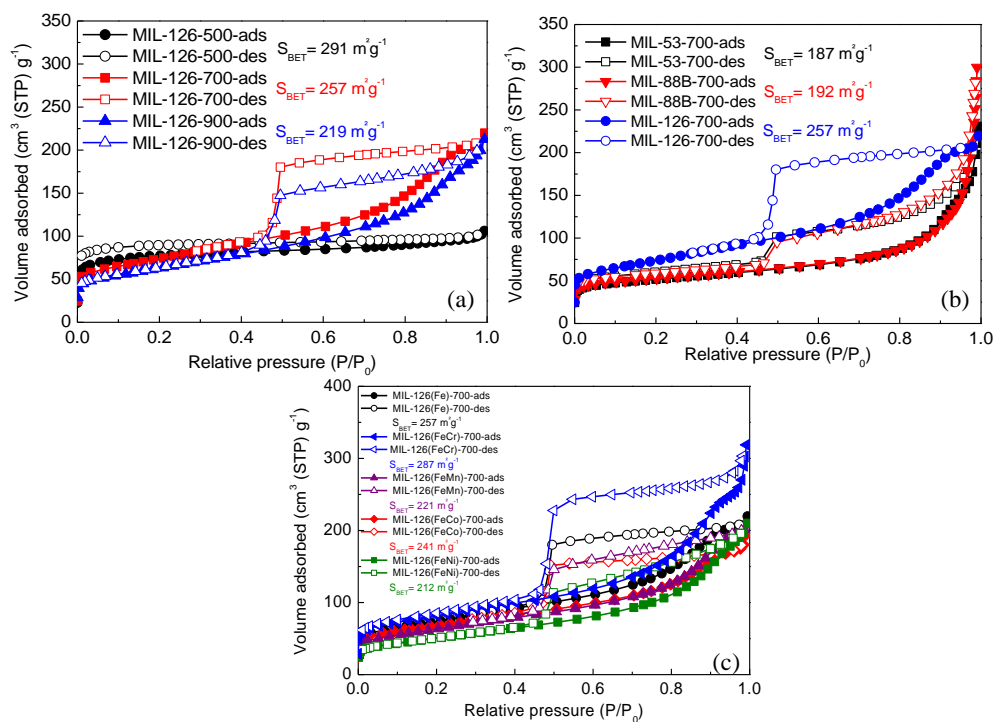

**Fig. S2.** N<sub>2</sub> adsorption-desorption isotherms of (a) carbonized MIL-126 at various temperature for 2 hours, (b) various iron-based MOFs after pyrolysis at 700 °C during 2 hours, and (c) bimetallic MIL-126(FeM) (where M = Ni, Co, Mn, Cr) after 2 hours heat treatment at 700 °C.

Transmission electron microscopy pictures of MIL-126(FeM)-700 composites

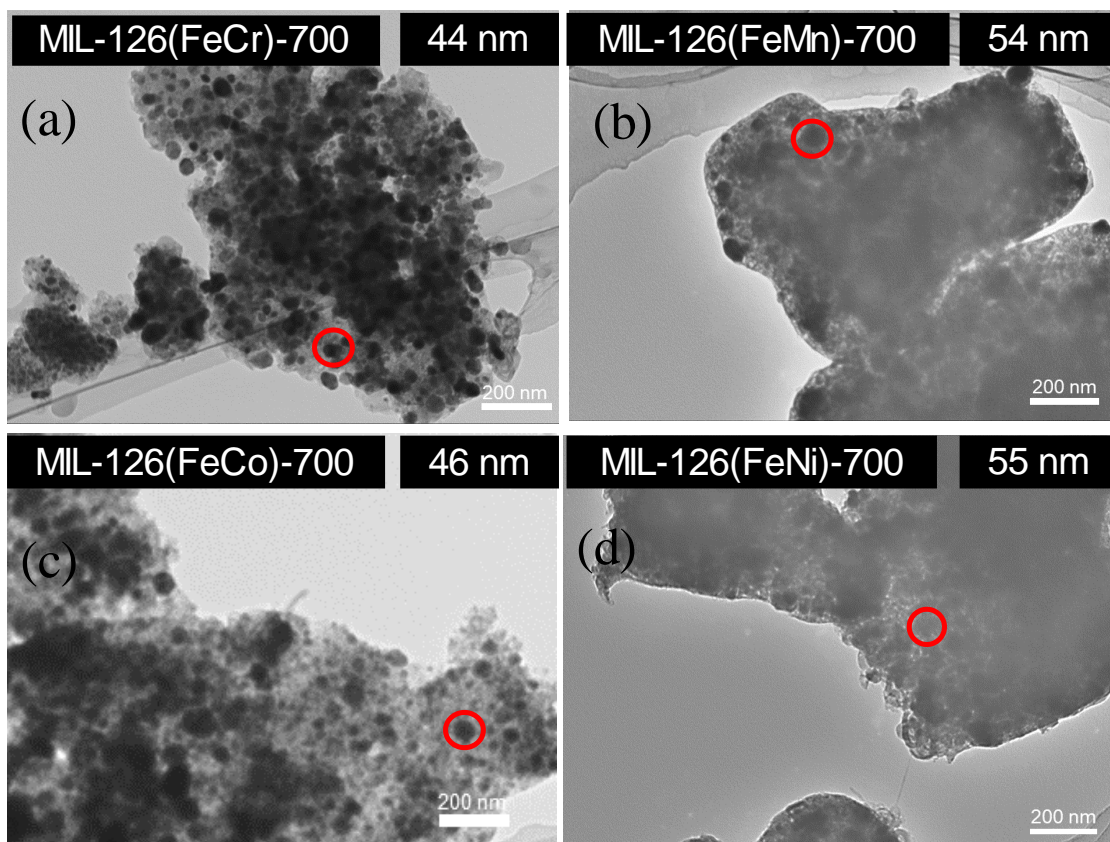

**Fig. S3.** TEM images of (a) MIL-126(FeCr)-700, (b) MIL-126(FeMn)-700, (c) MIL-126(FeCo)-700, and (d) MIL-126(FeNi)-700.
